# Supplementary material for: The cytohesin paralog Sec7 of Dictyostelium discoideum is required for phagocytosis and cell motility
Source: PubMed Central journal article supplement (PMC3737031; doi:10.1186/1478-811x-11-54), 2013-08-01
Supplement: 1478-811X-11-54-S2.pdf [file 1478-811X-11-54-S2.pdf]

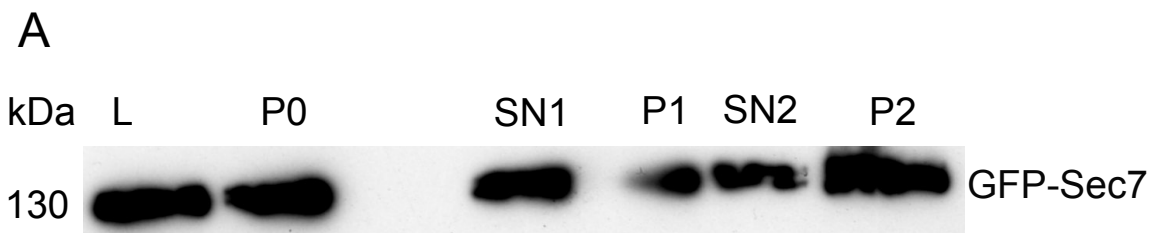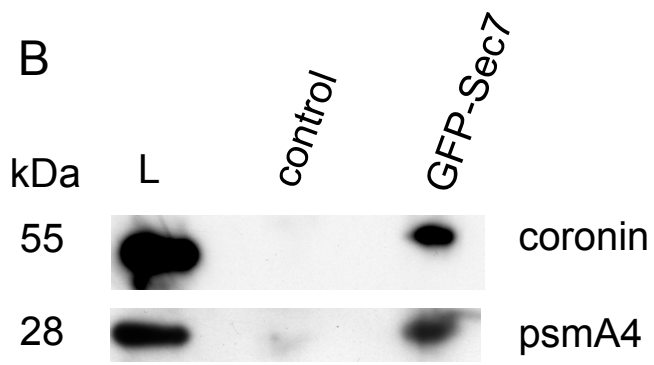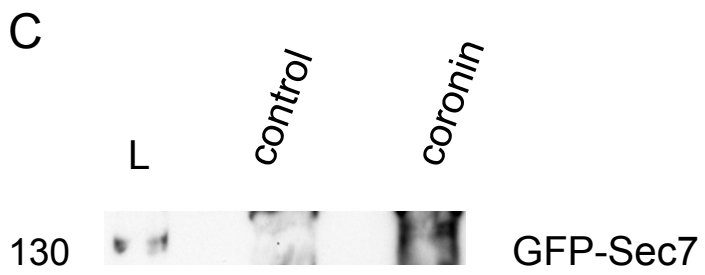

Figure S2A,B,C
